# Supplementary material for: Layered composites composed of multi-walled carbon nanotubes/manganese dioxide/carbon fiber cloth for microwave absorption in the X-band
Source: Royal Society of Chemistry journal article supplement (doi:10.1039/c9ra02819f), 2019-01-01
Supplement: c9ra02819f1.pdf [file c9ra02819f1.pdf]

## Supporting Information

### For RSC Advances

#### **Layered composites composed of multi-walled carbon nanotubes/manganese dioxide /carbon fiber cloth for microwave absorption in X-band**

Ke Zhao,<sup>a,b</sup> Shivam Gupta,<sup>b</sup> Ching Chang,<sup>b</sup> Jinquan Wei\*<sup>a</sup> and Nyan-Hwa Tai\*<sup>b</sup>

<sup>a</sup>State Key Lab of New Ceramic and Fine Processing, School of Materials Science and Engineering, Key Lab for Advanced Materials Processing Technology of

Education Ministry, Tsinghua University, Beijing, P.R. China

<sup>b</sup>Department of Materials Science and Engineering, National Tsing-Hua University, Hsinchu, Taiwan

\* Corresponding authors:

Jinquan Wei: [jqwei@tsinghua.edu.cn](mailto:jqwei@tsinghua.edu.cn)

Nyan-Hwa Tai: [nhtai@mx.nthu.edu.tw](mailto:nhtai@mx.nthu.edu.tw)

Morphologies of the CF cloth are shown in **Figure S1a** and **S1b**. The digital photo shows criss-cross CF bundles shining with metallic luster. It can be seen from the FESEM image that the diameter of CF with smooth surface is around 7.5  $\mu\text{m}$ . Examining the Raman spectrum of CF, there are two prominent Raman peaks at 1350 and 1580  $\text{cm}^{-1}$ , as shown in **Figure S1c**, corresponding to G-band and D-band of CF, respectively. The intensity ratio of D-band to G-band ( $I_D/I_G$ ) is 1.10, showing high crystallinity of the as-received CF. **Figure S1d** shows the XRD pattern of the CF cloth. There exists a strong peak at 24.9°, corresponding to the graphitic structure of (002) plane diffraction. A weak peak appears at 43.2° related to the structure of graphite (100) diffraction.

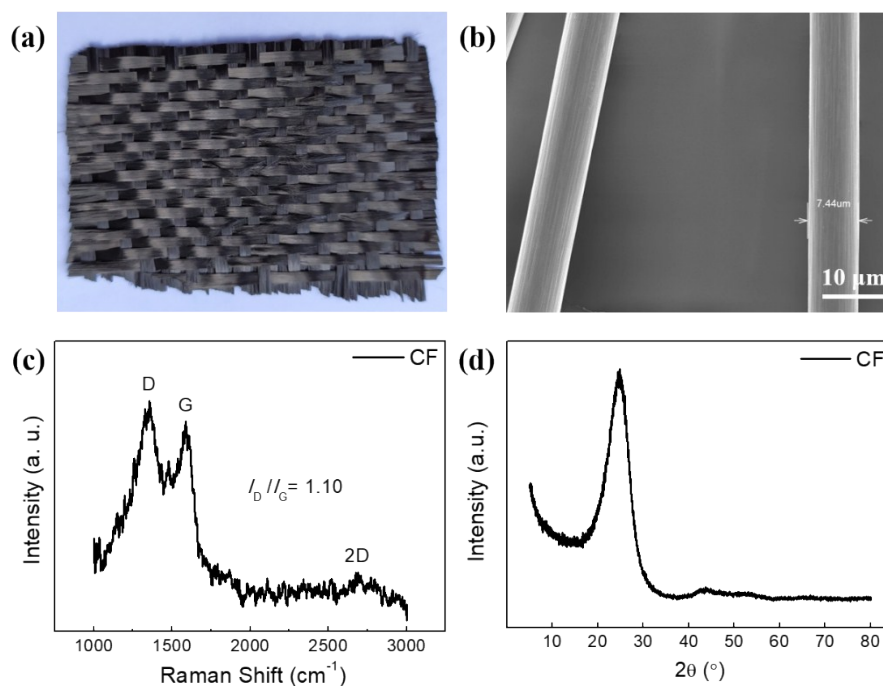

**Figure S1** Characterization of CF cloth: (a) digital photo, (b) SEM image, (c) Raman spectrum and (d) XRD pattern
